# Supplementary material for: Genetic Diversity of Type A Influenza Viruses Found in Swine Herds in Northwestern Poland from 2017 to 2019. The One Health Perspective
Source: Preprints.org preprint supplement (doi:10.20944/preprints202308.0649.v1), 2023-08-08
Supplement: Supplementary file 1 [file supplementary]

## Sheet: S1
			SUPPLEMENTARY TABLE 1: Reference dataset and accession numbers
			STRAIN	Accesion number
			A/Chile/1/1983
			PB2	X15283
			NA	M24783
			A/Netherlands/3315/2016
			PB2	KY250316
			HA	KY250319
			NA	KY250321
			A/swine/Netherlands/Rhezerveen-CVI9121A/2012
			PB2	KR701126
			HA	KR701129
			NA	KR701131
			A/Michigan/45/2015
			PB2	KU509700
			HA	KU509703
			NA	KU509705
			A/Taiwan/00185/2016
			PB2	MH328267
			HA	MH329072
			NA	MH328842
			A/California/07/2009
			PB2	NC_026438
			HA	NC_026433
			NA	NC_026434
			A/swine/Denmark/14348-3/2003
			PB2	KC900272
			HA	KC900275
			NA	KC900277
			A/swine/Belgium/1/1998
			PB2	KR701596
			HA	FJ805962
			NA	FJ805963
			A/Ohio/07/2016
			PB2	KX408520
			HA	KY044648
			NA	KX408525
			A/swine/Arnsberg/6554/1979
			PB2	KJ889305
			HA	KT715451
			NA	KJ889310
			A/swine/Italy/2064/99
			PB2	AJ306843
			HA	AJ344013
			NA	AJ412693
			A/swine/Italy/4675/2003
			PB2	JN596938
			HA	HM996942
			NA	HM996957
			A/swine/Sweden/1021/2009
			PB2	GQ495129
			HA	GQ495132
			NA	GQ495134
			A/swine/Denmark/2015_02408_1p1/2015
			PB2	MT666686
			HA	MT666689
			NA	MT666691
			A/swine/Italy/114347-1/2006
			HA	HQ658487
			NA	HQ660244
			A/swine/Italy/116114/2010
			PB2	CY067659
			HA	CY067662
			NA	CY067664
			A/swine/Cloppenburg/IDT4777/2005
			PB2	EU053138
			HA	EU053141
			NA	EU053143
			A/swine/Doetlingen/IDT4735/2005
			PB2	EU053130
			HA	EU053133
			NA	EU053135
			A/swine/Germany/SEk1178/2000
			HA	AM920737
			NA	AM920738
			A/swine/Sellingen/21094/2014
			PB2	MK340306
			HA	MK340309
			NA	MK340311
			A/swine/Nordkirchen/IDT1993/2003
			PB2	EU924268
			HA	EU924271
			NA	EU924273
			A/swine/Gent/1/1984
			PB2	MK361504
			HA	MK361507
			NA	MK361509
			A/swine/Potsdam/35/1982
			PB2	MK361498
			HA	MK361500
			NA	MK361502
			A/swine/Denmark/14348-9/2003
			PB2	KC900241
			HA	KC900244
			NA	KC900246
			A/Minnesota/37/2017
			PB2	CY250064
			HA	CY250067
			NA	CY250069
			A/swine/Leipzig/145/1992
			PB2	MK361517
			HA	MK361519
			NA	MK361521
			A/California/23/2016
			PB2	KX006226
			HA	KX006229
			NA	KX006231
			A/Arizona/50/2015
			PB2	KX406104
			HA	KX406107
			NA	KX406109
			A/Michigan/02/2016
			PB2	KX004823
			HA	KX004826
			NA	KX004828
			A/Dijon/1842/2016
			PB2
			HA
			NA
			A/swine/Italy/71251/2005
			PB2	CY116524
			HA	HM996944
			NA	HM996959
			A/Victoria/2123/2009
			PB2
			HA
			NA
			A/swine/Quebec/P0316/2011
			PB2	KX571162
			HA	KX571069
			NA	KX571228
			A/swine/Denmark/2016_11013_3p1/2016
			PB2	MT666630
			HA	MT666633
			NA	MT666635
			A/swine/Denmark/2016_1804_1p1/2016
			PB2	MT666638
			HA	MT666641
			NA	MT666643
			A/swine/Pskov_region/RII-8-100/2019
			PB2
			HA
			NA
			A/swine/Germany/R191/2013
			PB2
			HA
			NA
			A/swine/Doetlingen/IDT4777/2005
			PB2
			HA
			NA
			A/California/pdm09/2009
			PB2
			HA
			NA
			A/swine/Spain/06001/2019
			PB2	MZ373105
			HA	MZ373107
			NA	MZ373109
			A/swine/Pskov_region/RII-6-100/2019
			PB2
			HA
			NA
			A/swine/Sellingen/19342/2013
			PB2	MK340058
			HA	MK340061
			NA	MK340063
			A/swine/Denmark/18-6662-131_NA/2018
			NA	MT947003
			A/swine/Scotland/410440/94
			PB2	AJ306844
			HA	AF085413
			NA	AJ412697
			A/Beijing-Huairou/SWL 1660/2017
			PB2
			HA
			NA
			A/Taipei/0040/2016
			PB2	KY487411
			HA	KY487744
			NA	KY487229
			A/IIV-Moscow/208/2015
			PB2
			HA
			NA
			A/Baltimore/0104/2016
			PB2	KY487282
			HA	KY487646
			NA	KY487475
			A/Kaliningrad/RII01/2016
			PB2
			HA
			NA
			A/swine/Denmark/2017_1287_4_4p1/2017
			PB2	MT666909
			NA	MT666914
			A/swine/Cotes d Armor/60293/2001
			PB2
			HA
			NA
			A/swine/Cotes_d_Armor/0190/2006
			PB2	AM921750
			HA	AM503894
			NA	AM777824
			A/swine/Cotes_d_Armor/0388/2009
			NA	FR871194
			A/swine/Poland/KRY_200821_OF5/2020
			PB2	OQ168076
			HA	OQ168078
			NA	OQ168080
			A/swine/Poland/RAD_190405_NS5/2019
			PB2	OQ195963
			HA	OQ195966
			NA	OQ195968
			A/swine/Poland/LEK_190128_OF11/2019
			PB2	OQ168099
			HA	OQ168102
			NA	OQ168104
			A/swine/Poland/LEK_200304_NS5/2020
			PB2	OQ195955
			HA	OQ195958
			NA	OQ195960
			A/swine/Poland/KUJ_190717_OF9/2019
			PB2	OQ168091
			HA	OQ168094
			NA	OQ168096
			A/swine/Poland/LEK_190725 OF5/2019
			PB2	OQ168107
			HA	OQ168110
			NA	OQ168112
			A/swine/Poland/BAR 190214 OF5/2019
			PB2	OQ225787
			HA	OQ225790
			NA	OQ225792
			A/swine/Poland/BAR_190214 OF9/2019
			PB2	OQ225803
			HA	OQ225806
			NA	OQ225808
			A/swine/Poland/HRU 200616 OF7/2020
			PB2	OQ168052
			HA	OQ168055
			NA	OQ168057
			A/swine/Poland/HRU 190405 OF7/2019
			PB2	OQ168044
			HA	OQ168047
			NA	OQ168049
			A/swine/Poland/PBK 170322 OF5A/2017
			PB2	OQ168123
			HA	OQ168126
			NA	OQ168128
			A/swine/Poland/KRY_190214_OF5/2019
			PB2	OQ225733
			HA	OQ225752
			NA	OQ225766
